# Supplementary material for: Recyclable Choline Nicotinate and Ferulate Aqueous Solutions as Efficient Lignin Solvents
Source: MDPI journal article supplement (doi:10.3390/polym10080840), 2018-07-30
Supplement: s1 [file s1]

## Supplementary Information

### Recyclable choline nicotinate and ferulate aqueous solutions as efficient lignin solvents

Airong Xu,<sup>1,\*</sup> Lin Chen<sup>1</sup>, Xingmin Xu<sup>1</sup>, Zhihong Xiao<sup>2</sup>, and Rukuan Liu<sup>2,\*</sup>

<sup>1</sup> School of Chemical Engineering and Pharmaceutics, Henan University of Science and Technology, Luoyang, Henan 471003, P. R. China

<sup>2</sup> Hunan Academy of Forestry, Changsha, Hunan 410004, PR China

\* Correspondence: E-mail: airongxu@haust.edu.cn (A.R. Xu), Tel: +86-379-64231914; liurukuan@gmail.com (R.K. Liu), Tel: +86-371-85578794

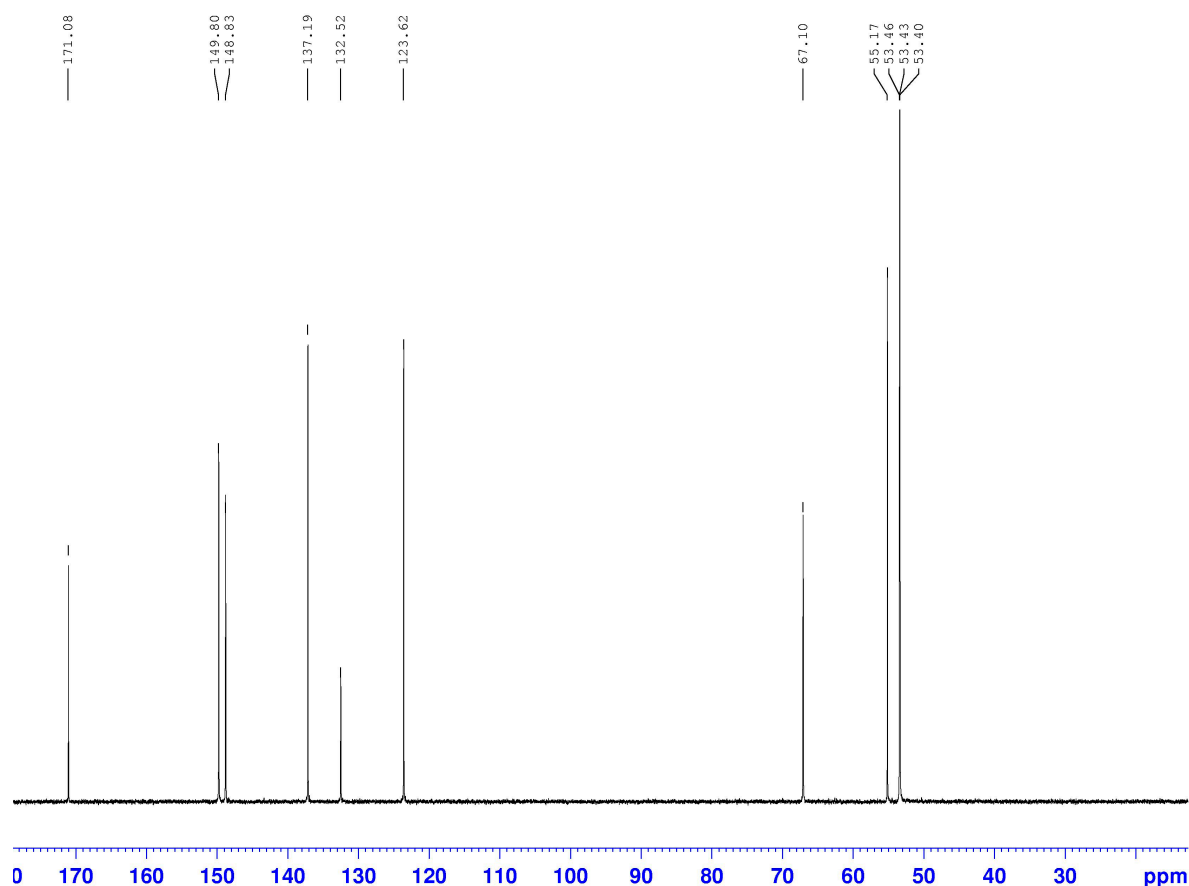

**Figure S1** The  $^{13}\text{C}$  NMR spectra of  $[\text{Ch}][\text{Na}]$  in  $\text{H}_2\text{O}/[\text{Ch}][\text{Na}]$  ( $R=10$ ) solvent at room temperature

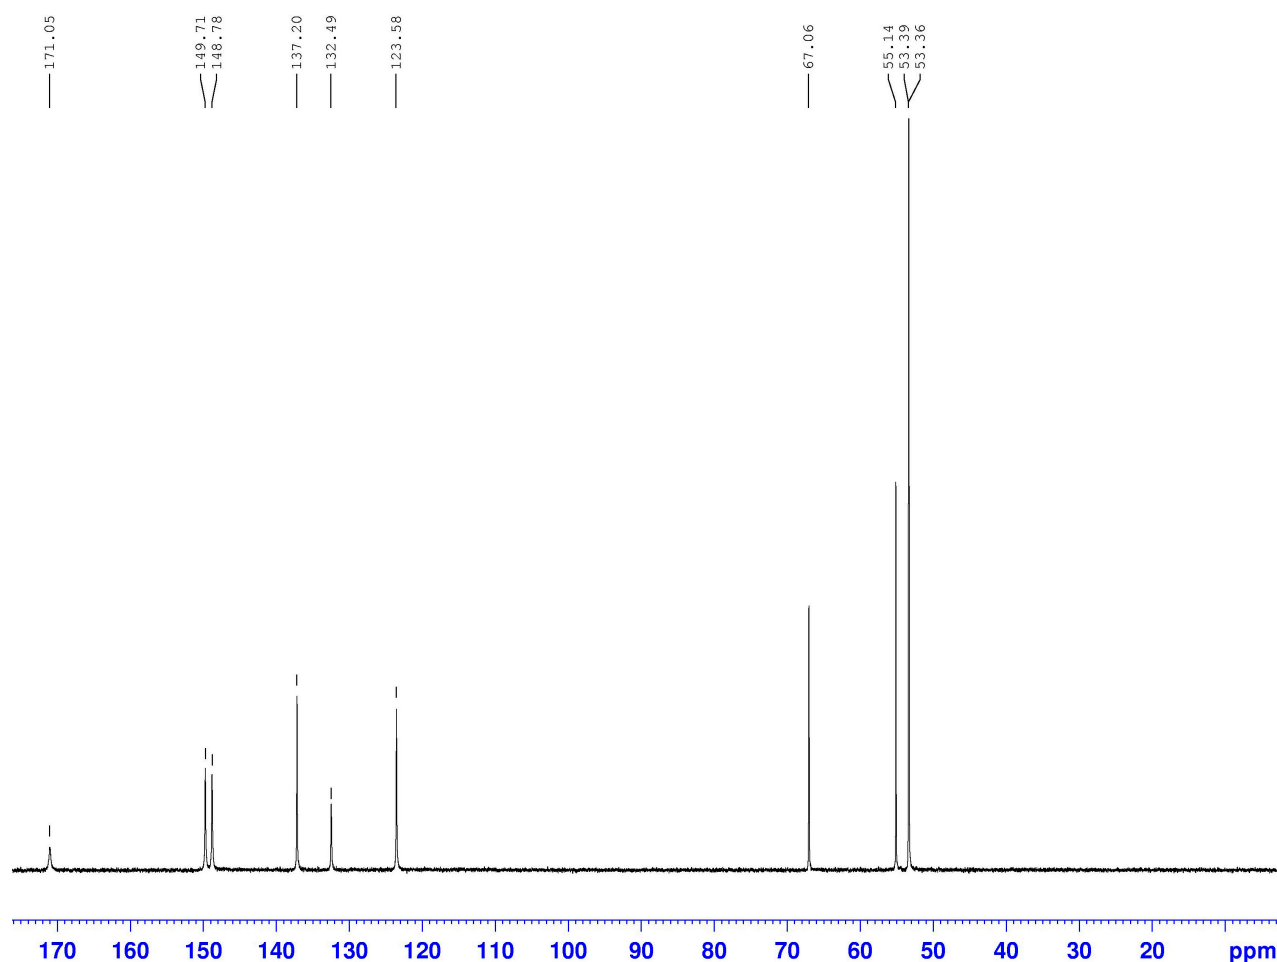

**Figure S2** The  $^{13}\text{C}$  NMR spectra of  $[\text{Ch}][\text{CH}_3\text{CH}_2\text{COO}]$  in  $[\text{Ch}][\text{Na}]$  in  $\text{H}_2\text{O}/[\text{Ch}][\text{Na}]$  ( $R=10$ )/lignin (8 wt.%) solution at room temperature

### FT-IR spectra analysis of the original lignin and the regenerated lignin

The absorption band at  $3429\text{ cm}^{-1}$  in the regenerated lignin is assigned to the stretching vibration of O-H of phenolic OH and aliphatic OH. The absorption band at  $2945\text{ cm}^{-1}$  is assigned to the stretching vibration of C-H of  $\text{CH}_3$  and  $\text{CH}_2$ . The absorption band at  $2845\text{ cm}^{-1}$  is assigned to the stretching vibration of C-H of  $\text{OCH}_3$ . The absorption bands at  $1600\text{ cm}^{-1}$ ,  $1515\text{ cm}^{-1}$  and  $1425\text{ cm}^{-1}$  are assigned to the stretching vibration of C-C of Aromatic skeleton. The absorption band at  $1460\text{ cm}^{-1}$  is assigned to the in-plane asymmetric deformation

vibration of C-H of CH<sub>3</sub> and CH<sub>2</sub>. The absorption band at 1270 cm<sup>-1</sup> is assigned to the stretching vibration of C-O of guaiacyl type. The absorption band at 1218 cm<sup>-1</sup> is assigned to the stretching vibration of C-O(H) + C-O(Ar) phenolic OH + ether. The absorption band at 1136 cm<sup>-1</sup> is assigned to the aromatic C-H in-plane deformation for syringyl type. The absorption band at 1030 cm<sup>-1</sup> is assigned to the stretching vibration of C-O(H) + C-O(C) of 1st order aliphatic OH + ether. The absorption bands at 855 cm<sup>-1</sup> and 810 cm<sup>-1</sup> are assigned to the out-of-plane deformation vibration of aromatic C-H of guaiacyl type. The FTIR spectra of the original and regenerated lignin are similar to those reported in the literatures[1-3]

### **Measurements of the thermal properties of [Ch][Na], [Ch][Fa], [Ch][Va] and [Ch][Sa]**

Melting temperature or glass transition temperature was determined on a Netzsch DSC 204 F1 differential scanning calorimetry. Each sample was sealed in aluminum pans and heated in the temperature range from -130 °C to 100 °C at a rate of 5 °C min<sup>-1</sup> under dry N<sub>2</sub> atmosphere.

Thermal decomposition temperature was determined on a Netzsch STA 449 C thermal gravimetric analyzer (TGA). Each IL sample was heated from room temperature to 600°C in an alumina crucible with 10 wt% of mass loss at a heating rate of 10 °C min<sup>-1</sup> under dry N<sub>2</sub> atmosphere. The temperatures reported from TGA data were the onset temperatures, which were determined from the step tangent.

### **References**

1. Tejado, A.; Peña, C.; Labidi, J.; Echeverria, J.M.; Mondragon, I. Physico-chemical characterization of lignins from different sources for use in phenol-formaldehyde resin synthesis. *Bioresour. Technol.* **2007**, *98*, 1655-1663.
2. Xiao, B.; Sun, X.F.; Sun, R.C. Chemical, structural, and thermal characterizations of alkali-soluble lignins and hemicelluloses, and cellulose from maize stems, rye straw, and rice straw. *Polym. Degrad. Stab.* **2001**, *74*, 307-319.

3. Pinkert, A.; Goeke, D.F.; Marsh, K.N.; Pang, S.S. Extracting wood lignin without dissolving or degrading cellulose: investigations on the use of food additive-derived ionic liquids. *Green Chem.* **2011**, *13*, 3124-3136.
